# Supplementary material for: Correlation between structural properties and nonradiative recombination behaviors of threading dislocations in freestanding GaN substrates grown by hydride vapor phase epitaxy
Source: Royal Society of Chemistry journal article supplement (doi:10.1039/d0ce01344g), 2020-01-01

(a) Original image of CL mapping

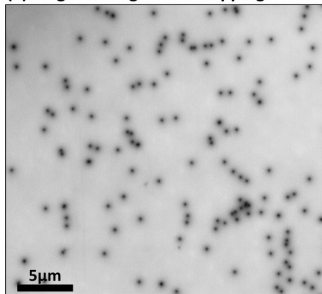

(b) Auto selection of dark spots

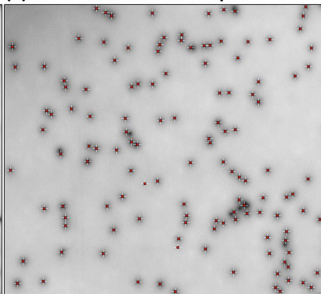

(c) Image crop of dark spots

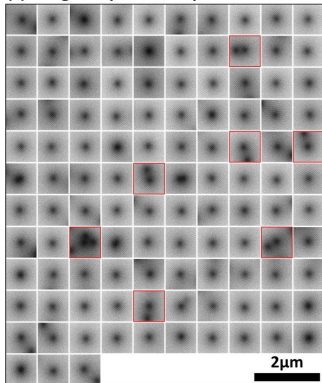

(d) Fitting results of dark spots

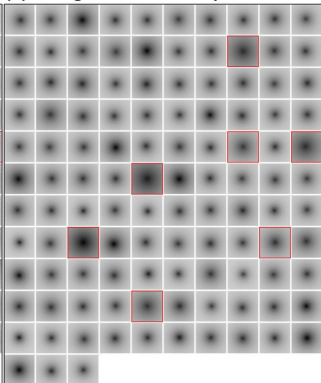

Supplement: d0ce01344g2.pdf [file d0ce01344g2.pdf]
