# Supplementary figures and images for: Correlation between structural properties and nonradiative recombination behaviors of threading dislocations in freestanding GaN substrates grown by hydride vapor phase epitaxy
Source: Royal Society of Chemistry journal article supplement (doi:10.1039/d0ce01344g), 2020-01-01

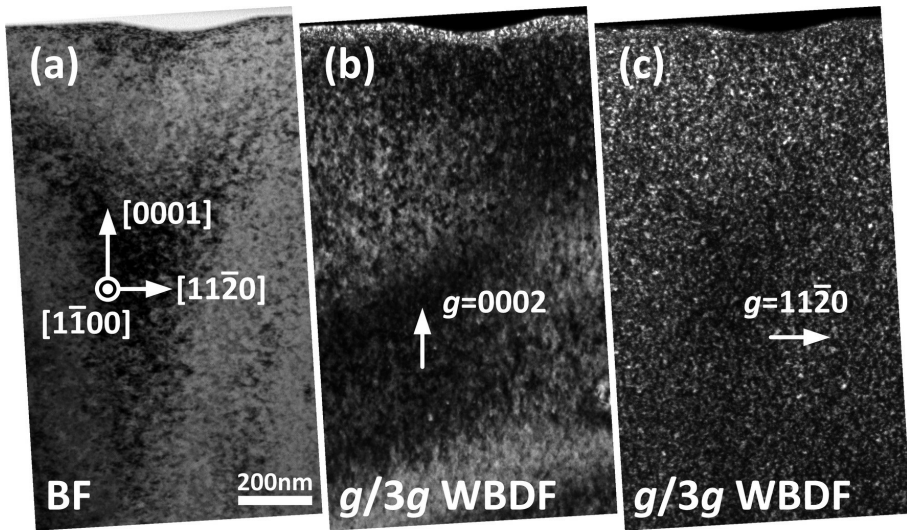

Supplement: d0ce01344g1.pdf [file d0ce01344g1.pdf]

**(a) Original etch pit image**

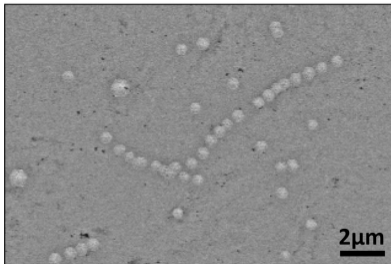

**(b) Extracting pit size and coordinates**

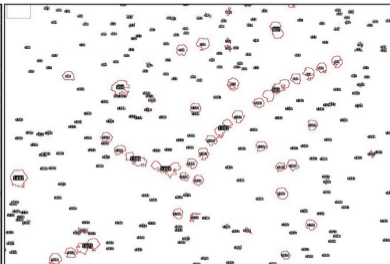

Supplement: d0ce01344g3.pdf [file d0ce01344g3.pdf]
